# Supplementary material for: Tjernberg peptide: a double edged sword in Alzheimer’s disease
Source: Royal Society of Chemistry journal article supplement (doi:10.1039/c5ra10746f), 2015-01-01
Supplement: c5ra10746f1.pdf [file c5ra10746f1.pdf]

### Supplementary data

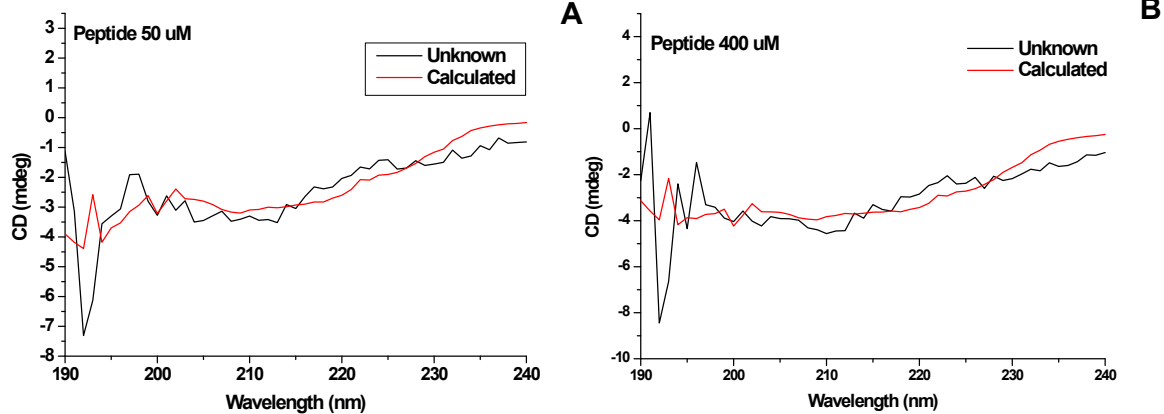

**Supplementary Figure 2:** CD spectra showing secondary structures of KLVFF peptide at different concentrations [A] 50  $\mu\text{M}$  and [B] 400  $\mu\text{M}$
